# Supplementary material for: Deep reefs are not universal refuges: Reseeding potential varies among coral species
Source: PubMed Central journal article supplement — Sci Adv. 2017 Feb 15;3(2):e1602373. doi: 10.1126/sciadv.1602373 (PMC5310828; doi:10.1126/sciadv.1602373), 2017-02-15
Supplement: 1602373_SM.pdf [file 1602373_SM.pdf]

## Supplementary Materials for

### Deep reefs are not universal refuges: Reseeding potential varies among coral species

Pim Bongaerts, Cynthia Riginos, Ramona Brunner, Norbert Englebert,  
Struan R. Smith, Ove Hoegh-Guldberg

Published 15 February 2017, *Sci. Adv.* **3**, e1602373 (2017)  
DOI: 10.1126/sciadv.1602373

#### This PDF file includes:

- fig. S1. Genotype frequencies of SNP outliers for *A. fragilis*.
- fig. S2. Genome-wide pairwise differentiation ( $F_{ST}$ ) of populations.
- fig. S3. Genetic structuring of *S. intersepta* populations based on most divergent SNPs.
- table S1. Details of the sampled *A. fragilis* and *S. intersepta* populations.
- table S2. Estimators of the number of STRUCTURE clusters for *A. fragilis* and *S. intersepta*.
- table S3. Genome-wide pairwise differentiation ( $F_{ST}$ ) of populations.

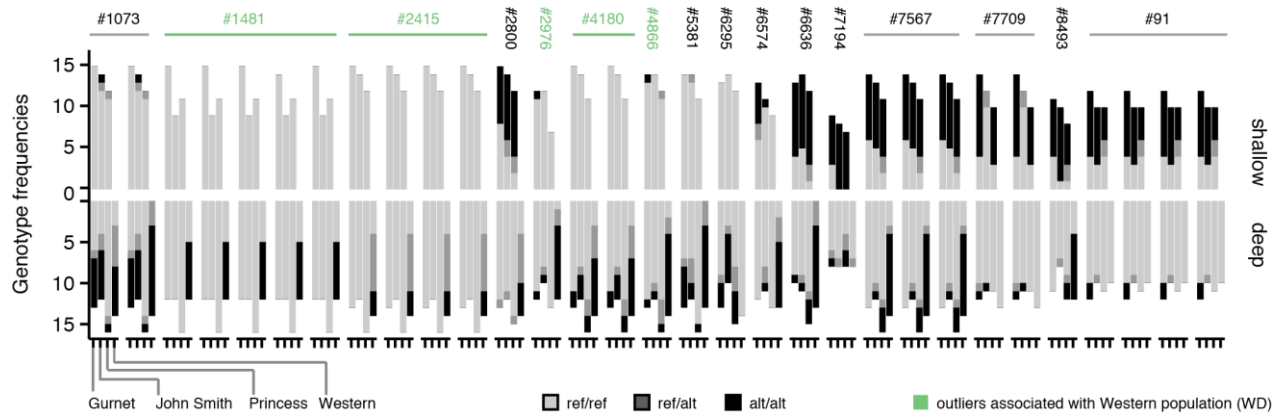

**fig. S1. Genotype frequencies of SNP outliers for *A. fragilis*.** Genotype frequencies of outlier SNPs (excluding those associated with depth) grouped by RAD locus (indicated by locus identifier) for shallow and deep populations. Hue of stacks indicate genotype (ref/ref = homozygote for the reference allele, ref/alt = heterozygote, alt/alt = homozygote for the alternative allele). Green labels indicate outlier loci in association with the “Western Blue Cut” (WD) population.

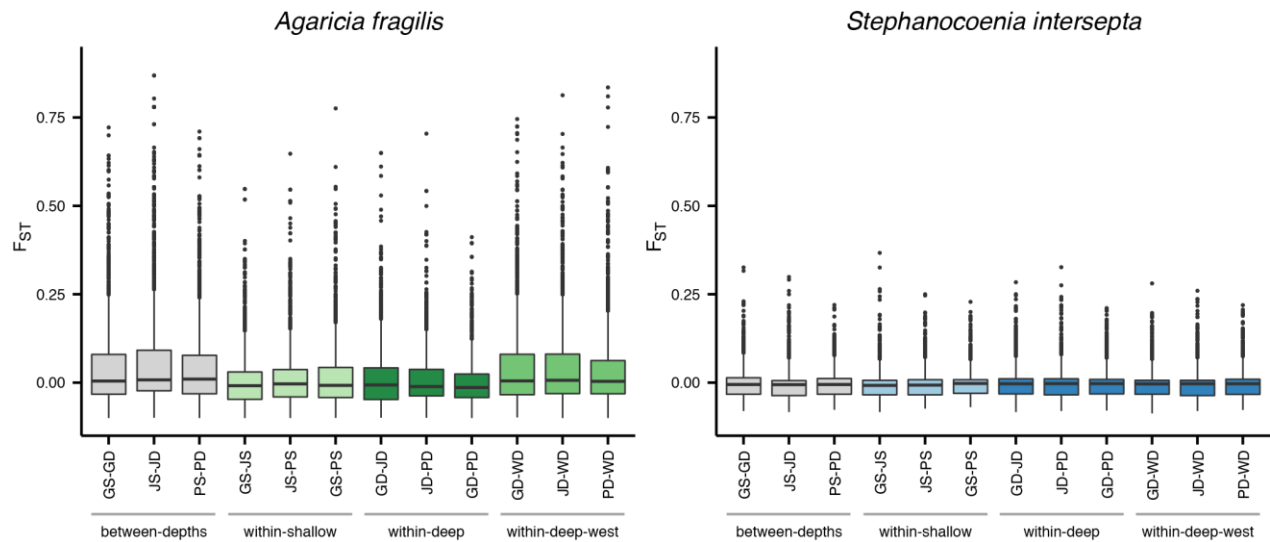

**fig. S2. Genome-wide pairwise differentiation ( $F_{ST}$ ) of populations.** Colors correspond to those of STRUCTURE clusters in Fig. 2, except for “gray” indicating between-depth comparisons.

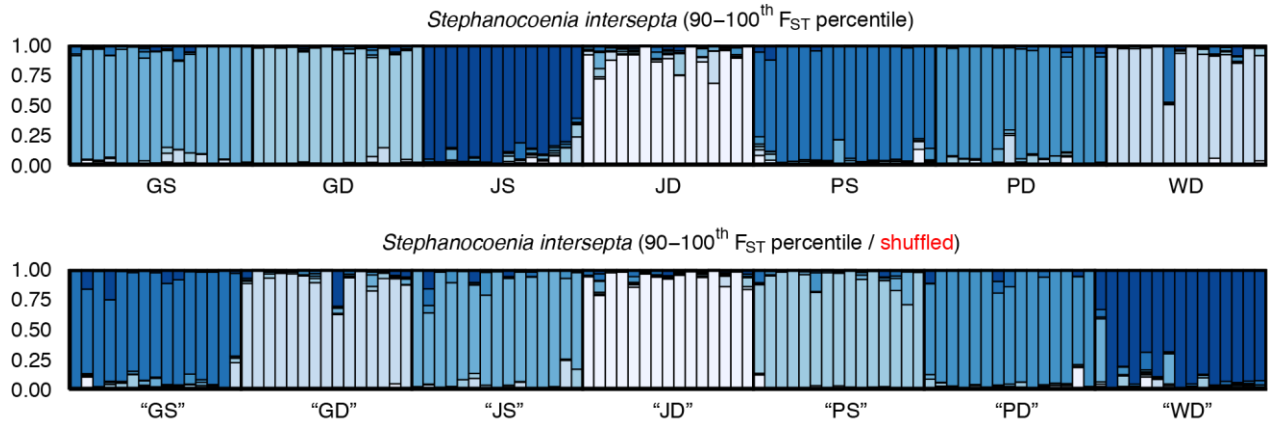

**fig. S3. Genetic structuring of *S. intersepta* populations based on most divergent SNPs.**

STRUCTURE diagrams for as inferred from the overall 90-100<sup>th</sup>  $F_{ST}$  percentile, for the actual dataset (top) and for the same dataset but with individuals “randomly” shuffled across populations prior to calculating  $F_{ST}$  (bottom).

**table S1. Details of the sampled *A. fragilis* and *S. intersepta* populations.** Details (code, name, depth and coordinates) of sampling locations, as well as the number of samples successfully sequenced (at each of these locations) and the genetic diversity (expected heterozygosity) as calculated from these sequenced samples.

| Site code | Site name        | Sampling Depth (m) | Coordinates (decimal degrees) | <i>Agaricia fragilis</i> |                             | <i>Stephanocoenia intersepta</i> |                             |
|-----------|------------------|--------------------|-------------------------------|--------------------------|-----------------------------|----------------------------------|-----------------------------|
|           |                  |                    |                               | Samples (N)              | Genetic diversity ( $H_E$ ) | Samples (N)                      | Genetic diversity ( $H_E$ ) |
| GS        | Gurnet Rock      | 12 m $\pm$ 2 m     | N32 19.981 W64 40.201         | 15                       | 0.1615541                   | 16                               | 0.1635142                   |
| GD        | Gurnet Rock      | 40 m $\pm$ 2 m     | N32 19.816 W64 39.333         | 15                       | 0.1672369                   | 15                               | 0.1618783                   |
| JS        | John Smith’s Bay | 12 m $\pm$ 2 m     | N32 18.795 W64 42.615         | 14                       | 0.1618625                   | 14                               | 0.1660883                   |
| JD        | John Smith’s Bay | 40 m $\pm$ 2 m     | N32 18.113 W64 42.130         | 15                       | 0.1658039                   | 15                               | 0.1622547                   |
| PS        | Princess Beach   | 12 m $\pm$ 2 m     | N32 14.679 W64 49.212         | 13                       | 0.1641213                   | 16                               | 0.1627970                   |
| PD        | Princess Beach   | 40 m $\pm$ 2 m*    | N32 13.796 W64 49.110         | 18                       | 0.1781947                   | 15                               | 0.1622498                   |
| WD        | Western Blue Cut | 40 m $\pm$ 2 m     | N32 22.204 W64 56.952         | 14                       | 0.2103866                   | 14                               | 0.1620870                   |

\*Two samples of *Agaricia fragilis* were collected from 63 m at this location.

**table S2. Estimators of the number of STRUCTURE clusters for *A. fragilis* and *S. intersepta*.**

| K   | <i>Agaricia fragilis</i> |             |             |             |             |             |             |             | <i>Stephanocoenia intersepta</i> |             |             |             |             |             |             |             |
|-----|--------------------------|-------------|-------------|-------------|-------------|-------------|-------------|-------------|----------------------------------|-------------|-------------|-------------|-------------|-------------|-------------|-------------|
|     | overall                  |             |             |             | “neutral”   |             |             |             | overall                          |             |             |             | “neutral”   |             |             |             |
|     | Med<br>MeaK              | Max<br>MeaK | Med<br>MedK | Max<br>MedK | Med<br>MeaK | Max<br>MeaK | Med<br>MedK | Max<br>MedK | Med<br>MeaK                      | Max<br>MeaK | Med<br>MedK | Max<br>MedK | Med<br>MeaK | Max<br>MeaK | Med<br>MedK | Max<br>MedK |
| 2   | 2.0                      | 2           | 2.0         | 2           | 2.0         | 2           | 2.0         | 2           | 1.0                              | 1           | 1.0         | 1           | 1.0         | 1           | 1.0         | 1           |
| 3   | 3.0                      | 3           | 3.0         | 3           | 3.0         | 3           | 3.0         | 3           | 0.5                              | 1           | 0.5         | 1           | 1.0         | 1           | 1.0         | 1           |
| 4   | 3.0                      | 3           | 3.0         | 3           | 3.0         | 4           | 3.0         | 4           | 1.0                              | 2           | 1.0         | 2           | 1.0         | 2           | 1.0         | 2           |
| 5   | 3.0                      | 4           | 3.0         | 4           | 2.0         | 4           | 2.0         | 4           | 1.0                              | 2           | 1.0         | 2           | *           | *           | *           | *           |
| 6   | 3.0                      | 4           | 3.0         | 4           | 2.0         | 3           | 2.0         | 3           | 1.0                              | 2           | 1.0         | 2           | *           | *           | *           | *           |
| 7   | 2.5                      | 3           | 2.5         | 3           | 1.0         | 2           | 1.0         | 2           | 0.7                              | 2           | 0.0         | 2           | *           | *           | *           | *           |
| Max | 3                        | 4           | 3           | 4           | 3           | 4           | 3           | 4           | 1                                | 2           | 1           | 2           | 1           | 2           | 1           | 2           |

\*Given an apparent lack of structure, no further analyses were conducted for these K values.

**table S3. Genome-wide pairwise differentiation ( $F_{ST}$ ) of populations.**

| Category         | Code    | Comparison | <i>Agaricia fragilis</i> |            | <i>Stephanocoenia intersepta</i> |            |
|------------------|---------|------------|--------------------------|------------|----------------------------------|------------|
|                  |         |            | Pairwise Fst             | SD         | Pairwise Fst                     | SD         |
| Between-depts    | Habt.G  | GS vs GD   | 0.044362993              | 0.13073676 | 0.0006686492                     | 0.04543634 |
|                  | Habt.J  | JS vs JD   | 0.058421089              | 0.15207999 | -0.0029964692                    | 0.04681601 |
|                  | Habt.P  | PS vs PD   | 0.044208650              | 0.12486853 | -0.0013645180                    | 0.04008300 |
| Within-shallow   | Shal.GJ | GS vs JS   | 0.003175759              | 0.08125830 | -0.0031695622                    | 0.04477598 |
|                  | Shal.JP | JS vs PS   | 0.012652416              | 0.09337787 | -0.0041312842                    | 0.04012289 |
|                  | Shal.GP | GS vs PS   | 0.013741802              | 0.09850756 | -0.0011748328                    | 0.03819686 |
| Within-deep      | Deep.GJ | GD vs JD   | 0.011968014              | 0.09466032 | 0.0018560410                     | 0.04751326 |
|                  | Deep.JP | JD vs PD   | 0.011920970              | 0.07991237 | 0.0010777546                     | 0.04670673 |
|                  | Deep.GP | GD vs PD   | 0.001320425              | 0.06945603 | 0.0006181086                     | 0.04393596 |
| Within-deep-west | West.GW | GD vs WD   | 0.041809349              | 0.12038205 | -0.0012076287                    | 0.04448286 |
|                  | West.JW | JD vs WD   | 0.041948989              | 0.11847511 | -0.0013961982                    | 0.04609704 |
|                  | West.PW | PD vs WD   | 0.034801295              | 0.10693032 | -0.0001315717                    | 0.04390589 |
